# Supplementary material for: Unveiling the relationship between the multilayer structure of metallic MoS2 and the cycling performance for lithium ion batteries
Source: Royal Society of Chemistry journal article supplement (doi:10.1039/d2nr00967f), 2022-01-01
Supplement: d2nr00967f1.pdf [file d2nr00967f1.pdf]

Supplementary Information for

**Unveiling the relationship between the multilayer structure of metallic MoS<sub>2</sub> and the cycling performance for lithium ion batteries**

*Zhipeng Liu, Kaiwen Wang, Guoqing Huang, Shuyi Yu, Xiaotian Li, Nan Li\*, Kaifeng Yu\**

Key Laboratory of Automobile Materials (Ministry of Education), School of Materials Science and Engineering, Jilin University, 2699 Qianjin Street, Changchun, 130012, P. R. China

## **Experimental section**

### ***1. Synthesis of samples***

For the preparation of the 1T-MoS<sub>2</sub>/Ti electrode, 12 mg of molybdenum trioxide (MoO<sub>3</sub>) and 50 mg of sodium sulfide (NaS<sub>2</sub>·9H<sub>2</sub>O) were dissolved in 24 mL of deionized water and stirred for 10 min to get a homogeneous solution. Afterwards, 30 mg of thioacetamide (CH<sub>3</sub>CSNH<sub>2</sub>) and 120 mg of urea (CO(NH<sub>2</sub>)<sub>2</sub>) were added to the solution. Then, the solution was transferred into a 50-mL Teflon-lined stainless autoclave. A piece of Ti foil (2 cm × 3cm), which was previously rinsed successively with 3 M HCl, deionized water, and ethanol, was immersed in the solution. The autoclave was sealed and heated in an oven at 200 °C for 12 h. After cooling to room temperature, the Ti foil was rinsed thoroughly with deionized water, ethanol, and carbon disulfide (CS<sub>2</sub>) several times and dried in a vacuum at 60 °C. For comparison, a 2H-MoS<sub>2</sub>/Ti electrode was prepared by annealing the as-obtained 1T-MoS<sub>2</sub>/Ti in Ar flow at 350 °C for 2h.

### ***2. Characterization***

Raman spectra were collected on a micro-Raman spectrometer (Renishaw) with a laser of 532 nm wavelength at 0.2 mW. X-ray photoelectron spectroscopy (XPS) analyses were conducted on an ESCALAB 250 electron spectrometer with an Al K $\alpha$  radiation source ( $h\nu = 1486.6$  eV). The microstructure and morphology of samples were observed through scanning electron microscopy (SEM, JEOL JSM-6700F), transmission electron microscopy (TEM, JEOL JEM-2100F), and high-angle annular dark-field scanning transmission electron microscopy (HAADF-STEM, JEOL JEM-

ARM300F GRAND ARM with aberration correctors). TEM samples were prepared by desquamating MoS<sub>2</sub> nanosheets from Ti foils through ultrasonic treatment.

### *3. Electrochemical Testing*

The 2025-type coin cells were assembled in an argon-filled glove box. The as-synthesized 1T-MoS<sub>2</sub> electrode (diameter of 12 mm) was directly served as the working electrode and a pure lithium foil as the counter electrode. A solution of 1M LiPF<sub>6</sub> dissolved in ethylene carbonate (EC)/dimethyl carbonate (DMC) (1:1 by volume) was utilized as the electrolyte, and a Celgard 2500 membrane was chosen as the separator. The cycling test of cells was performed on a CT2001A LAND multi-channel battery tester by sweeping between 3 and 0.01 vs Li<sup>+</sup>/Li. Cyclic voltammetry curves were obtained on a PARSTAT 3000A-DX electrochemical working station with a scan rate of 0.2 mV·s<sup>-1</sup> at a voltage range of 0.01 to 3 V vs Li<sup>+</sup>/Li.

### *4. Computational details*

All calculations were performed based on density function theory (DFT) by using the Cambridge Sequential Total Energy Package (CASTEP). The electronic exchange-correlation energy was treated by the spin-polarized, generalized-gradient approximation of Perdew–Burke–Ernzerhof (PBE). The models of lithiated MoS<sub>2</sub> nanosheets were created on the basis of MoS<sub>2</sub> supercells with various layer thicknesses. The interlayer van der Waals interactions (vdWs) in pristine and lithiated MoS<sub>2</sub> nanosheets were correlated using PBE functional with the vdWs dispersion correction (DFT-D2) for accuracy. Brillouin Zone (BZ) integrations were performed on a grid of (5 × 5 × 1) Monkhorst–Pack k-point sets. Ultrasoft pseudopotentials were

utilized along with a plane-wave cut-off energy of 400 eV. For geometry optimization, the convergence criteria of electronic and ionic interactions were set as  $10^{-3}$  and  $10^{-2}$  eV·Å<sup>-1</sup>, respectively. More details are presented in the supporting information.

The thermodynamic phase diagrams were calculated following a previous report with some modifications. For the formation of Li-Mo-S ternary compounds, the chemical potential of Li, Mo, and S should satisfy the following equation:

$$\Delta\mu_{\text{Li}} + \Delta\mu_{\text{Mo}} + \Delta\mu_{\text{S}} = \Delta E_{\text{f}}(\text{Li}_x\text{Mo}_y\text{S}_{2y})$$

where  $\Delta\mu_{\text{Li}}$ ,  $\Delta\mu_{\text{Mo}}$  and  $\Delta\mu_{\text{S}}$  are the chemical potentials of Li, Mo, and S referring to their bulks, respectively.  $\Delta E_{\text{f}}(\text{Li}_x\text{Mo}_y\text{S}_{2y})$  is the formation energy of Li-Mo-S ternary compounds. (See details in Table S1) In order to avoid the formation of elementary substances of Li, Mo, or S, the chemical potential of elements should satisfy the following condition:

$$\Delta\mu_{\text{Li}} \leq 0; \Delta\mu_{\text{Mo}} \leq 0; \Delta\mu_{\text{S}} \leq 0$$

Furthermore, the chemical potential of Li, Mo, and S should obey the following equation to avoid the formation of secondary Li<sub>2</sub>S and MoS<sub>2</sub>:

$$2\Delta\mu_{\text{Li}} + \Delta\mu_{\text{S}} \leq \Delta E_{\text{f}}(\text{Li}_2\text{S}); \Delta\mu_{\text{Mo}} + 2\Delta\mu_{\text{S}} \leq \Delta E_{\text{f}}(\text{MoS}_2)$$

where  $\Delta E_{\text{f}}(\text{Li}_2\text{S})$  and  $\Delta E_{\text{f}}(\text{MoS}_2)$  are the formation energy of Li<sub>2</sub>S and MoS<sub>2</sub>, respectively.

The adsorption energy ( $E_{\text{a}}$ ) between 1T-MoS<sub>2</sub> and polysulfide species (L<sub>2</sub>S<sub>4</sub> or L<sub>2</sub>S<sub>6</sub>) was calculated according to the following equation:

$$E_{\text{a}} = E_{\text{s}} - \Delta E_{\text{f}}(\text{MoS}_2) - \Delta E_{\text{f}}(\text{Li}_2\text{S}_4 \text{ or } \text{Li}_2\text{S}_6)$$

where  $E_{\text{s}}$  is the total energy of system, while  $\Delta E_{\text{f}}(\text{MoS}_2)$  and  $\Delta E_{\text{f}}(\text{Li}_2\text{S}_4 \text{ or } \text{Li}_2\text{S}_6)$  are

the formation energies of 1T-MoS<sub>2</sub> and polysulfide species (L<sub>2</sub>S<sub>4</sub> or L<sub>2</sub>S<sub>6</sub>), respectively. The formation energies of 1T-MoS<sub>2</sub>, 2H-MoS<sub>2</sub> and lithiated 1T-MoS<sub>2</sub> and 2H-MoS<sub>2</sub> with various layer numbers are listed in Table S1.

## Supplementary Figures and Tables

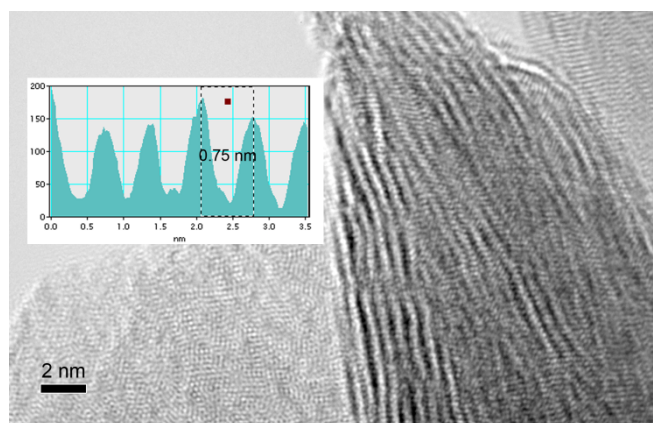

**Fig. S1** HRTEM image of the lateral view of 1T-MoS<sub>2</sub>.

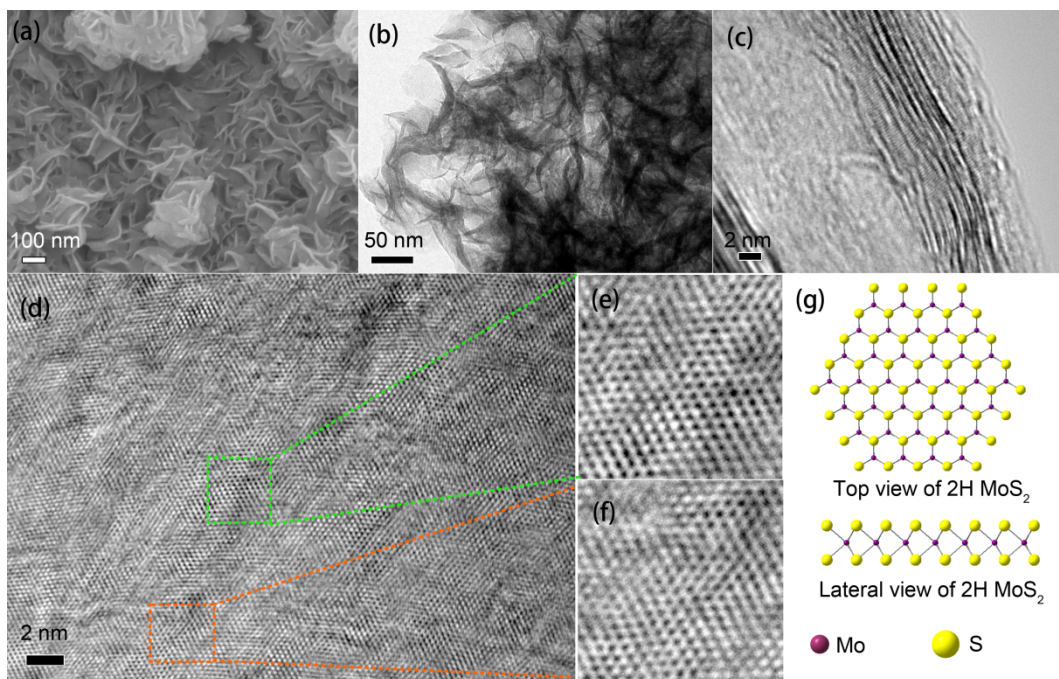

**Fig. S2** Morphological characterization of 2H-MoS<sub>2</sub>/Ti. (a) SEM and (b-d) (HR)TEM images. (e, f) zoom-in view of the selected region in the HRTEM image of (d); (g) crystal structure of 2H-MoS<sub>2</sub>.

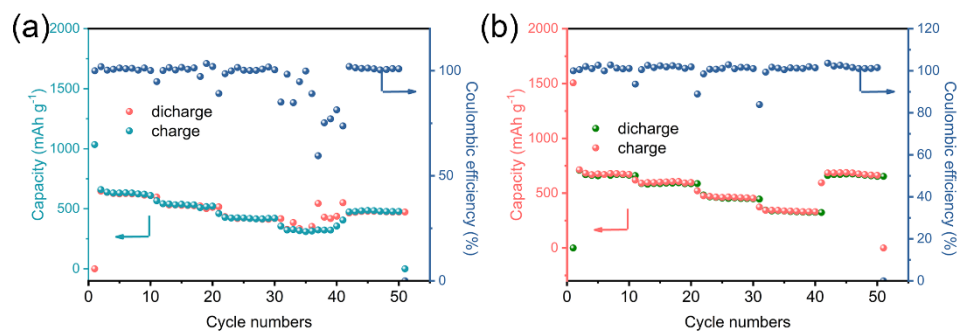

**Fig. S3** Rate performance of (a) 2H-MoS<sub>2</sub>/Ti and (b) 1T-MoS<sub>2</sub>/Ti under current densities of 100, 200, 300 and 500 mA·mg<sup>-1</sup> and then recovered to 100 mA·mg<sup>-1</sup>.



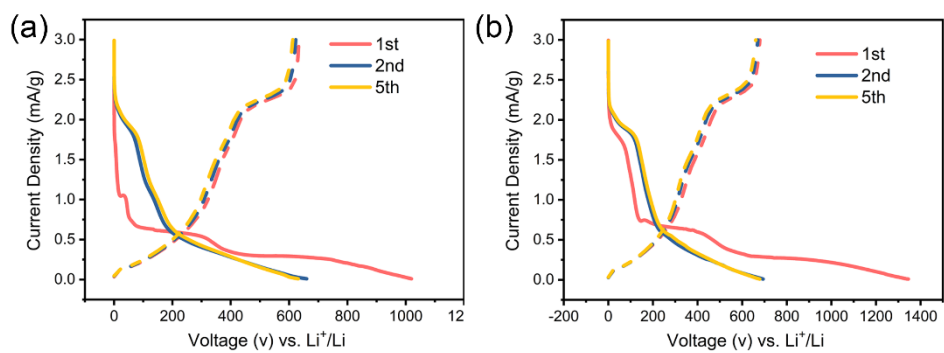

**Fig. S4** Charge-discharge curves of 2H-MoS<sub>2</sub>/Ti and 1T-MoS<sub>2</sub>/Ti under a current density of 100 mA·mg<sup>-1</sup>.

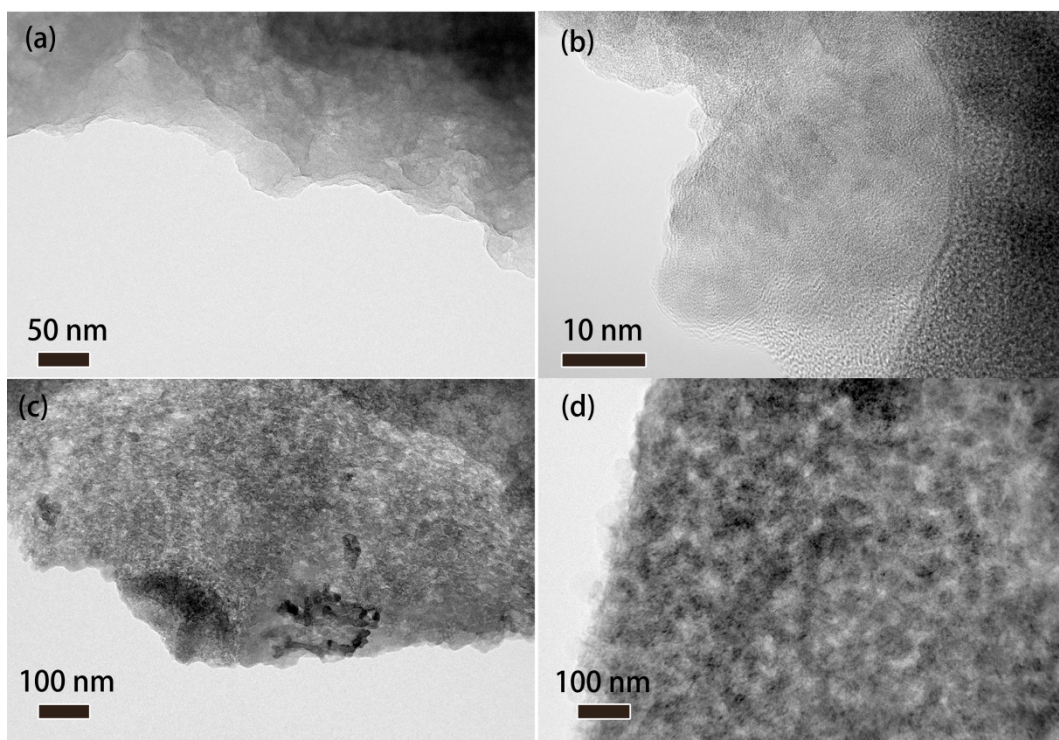

**Fig. S5** Morphological characterization of the exfoliation from the electrodes cycled for various times. TEM images of the exfoliation from (a) 2H-MoS<sub>2</sub>/Ti after the initial discharge process and (b) the recharged process. (c) 1T-MoS<sub>2</sub>/Ti after the initial discharge and (d) the recharged process.

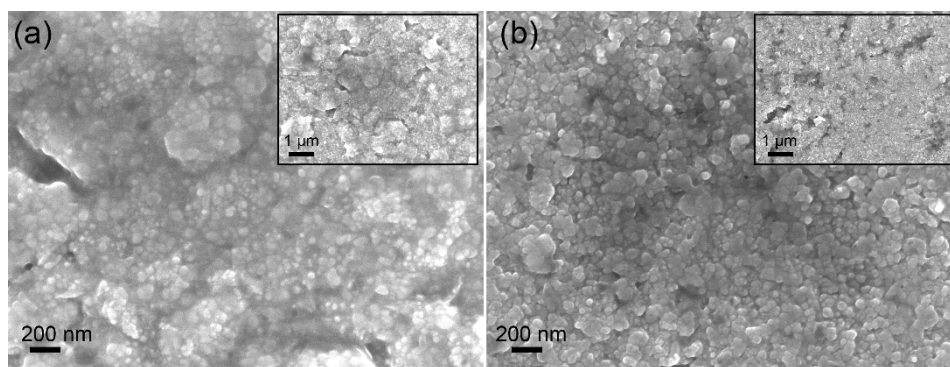

**Fig. S6** Morphological characterization (a) 2H-MoS<sub>2</sub>/Ti and (b) 1T-MoS<sub>2</sub>/Ti after initial 5 charge-discharge cycles.

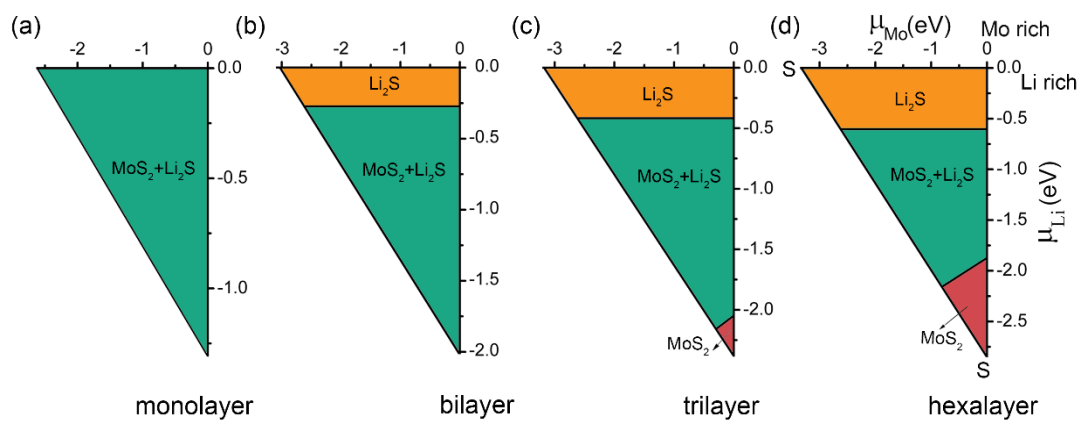

**Fig. S7** Thermodynamic phase diagram of lithiated 2H MoS<sub>2</sub> with various layer numbers.

**Table S1.** The formation energies of 1T-MoS<sub>2</sub>, 2H-MoS<sub>2</sub> and lithiated 1T-MoS<sub>2</sub> and 2H-MoS<sub>2</sub> with various layer numbers.

| Species                                                                       | Formation Energy (eV) |
|-------------------------------------------------------------------------------|-----------------------|
| Li(1)                                                                         | 0                     |
| Mo(1)                                                                         | 0                     |
| S(32)                                                                         | 0                     |
| Li <sub>2</sub> S(1)                                                          | -4.317                |
| 2H-MoS <sub>2</sub> (1)                                                       | -2.620                |
| 1T-MoS <sub>2</sub> (1)                                                       | -1.811                |
| 1Layer-2H-MoS <sub>2</sub> (Li <sub>2</sub> MoS <sub>2</sub> )                | -2.619                |
| 2Layer-2H-MoS <sub>2</sub> (Li <sub>3</sub> Mo <sub>2</sub> S <sub>4</sub> )  | -6.059                |
| 3Layer-2H-MoS <sub>2</sub> (Li <sub>4</sub> Mo <sub>3</sub> S <sub>6</sub> )  | -9.529                |
| 6Layer-2H-MoS <sub>2</sub> (Li <sub>7</sub> Mo <sub>6</sub> S <sub>12</sub> ) | -19.949               |
| 1Layer-1T-MoS <sub>2</sub> (Li <sub>2</sub> MoS <sub>2</sub> )                | -2.963                |
| 2Layer-1T-MoS <sub>2</sub> (Li <sub>3</sub> Mo <sub>2</sub> S <sub>4</sub> )  | -6.781                |
| 3Layer-1T-MoS <sub>2</sub> (Li <sub>4</sub> Mo <sub>3</sub> S <sub>6</sub> )  | -14.262               |
| 6Layer-1T-MoS <sub>2</sub> (Li <sub>7</sub> Mo <sub>6</sub> S <sub>12</sub> ) | -29.213               |
